# Supplementary material for: Thrombospondin Encapsulated Dense Particles accelerate wound healing and downregulate fibrotic phenotypes
Source: Research Square preprint supplement (doi:10.21203/rs.3.rs-7943553/v1), 2025-10-30
Supplement: Supplementary file 1 [file f7ef6ae02c35bc331fe3694d.pdf]

**a**Cell Media Screening  
(CM) Protocol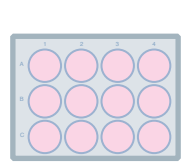

12-well plate

Transfect  
HEK293TCollect Cell Media  
48hrs post OptiMEM  
Media Change500xg  
10 mins4000xg  
20 mins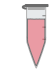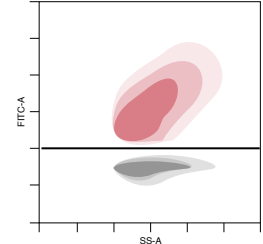nanoFCM  
% GFP + ParticlesSize Exclusion Chromatography  
(SEC) Protocol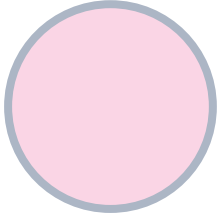

15cm plate

Transfect  
HEK293TCollect Cell Media  
48hrs post OptiMEM  
Media Change500xg  
10 mins4000xg  
20 mins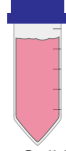Tangential  
Flow  
FiltrationSpin  
FiltrationSize  
Exclusion  
Chromatography

4 hours / sample

**b**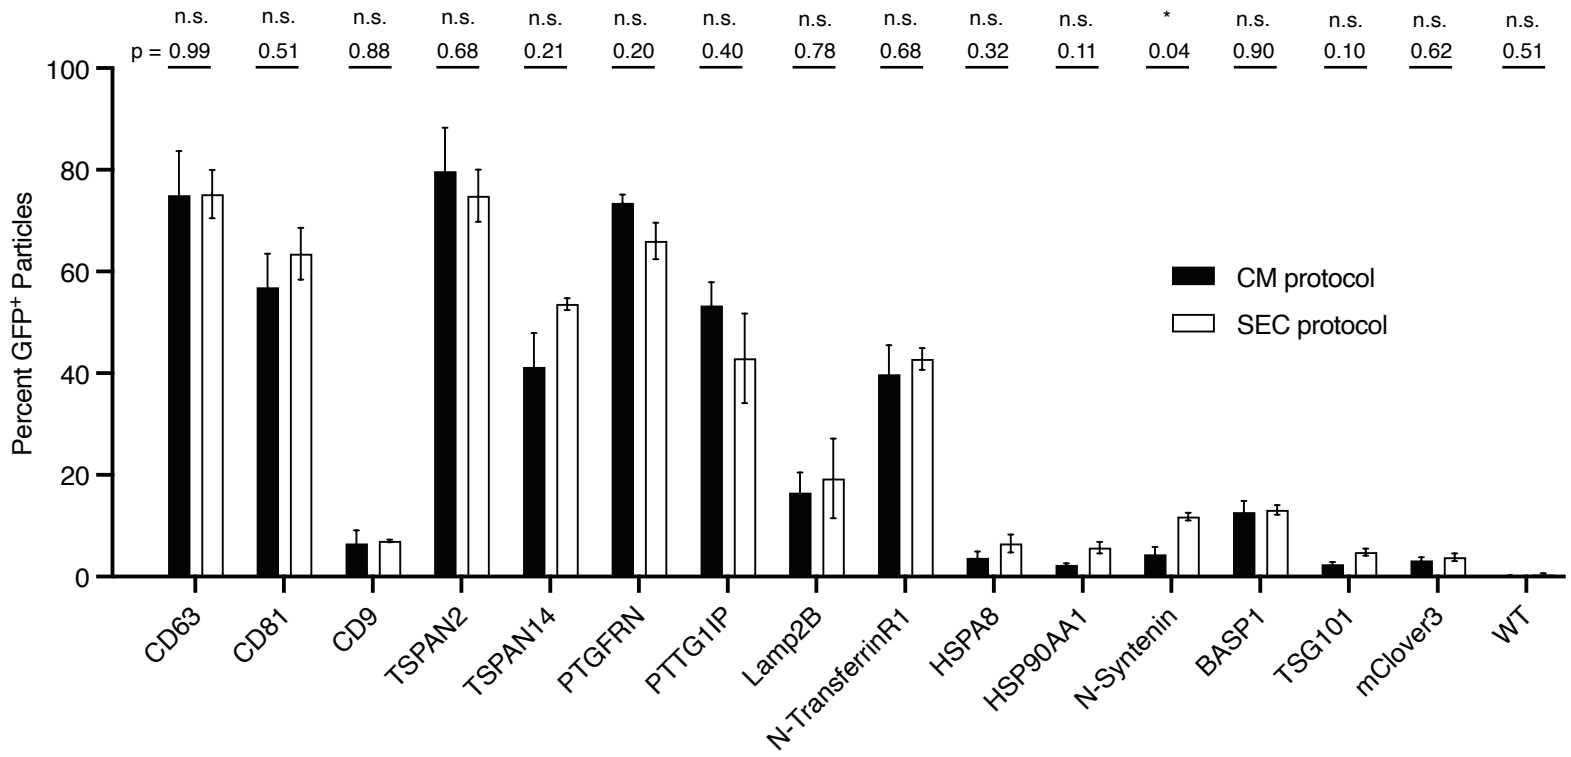

- 1 **Figure S1. Validating an EV marker screening assay for single particle analysis.**
- 2 (A) Schematic representing the EV marker screening assay protocol. (B) Percentage of GFP+
- 3 (mClover3) EVs from transiently transfected HEK-293T cells isolated by CM or SEC protocols.
- 4 Data are presented as the mean  $\pm$  SEM, n = 3 biological replicates, n.s.  $P > 0.05$ , \*  $P < 0.05$ .

**a**

## HEK-293T derived extracellular particles

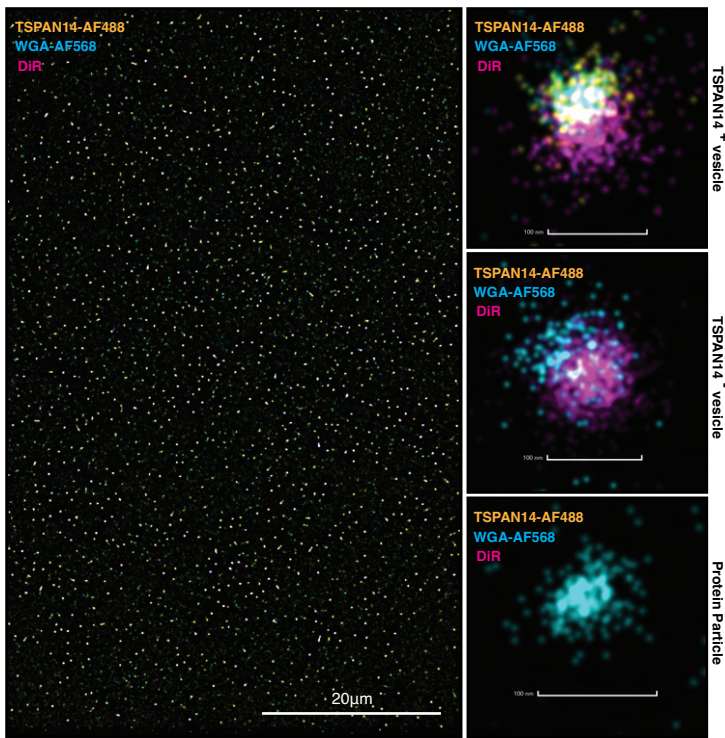**b**

## A549 derived extracellular particles

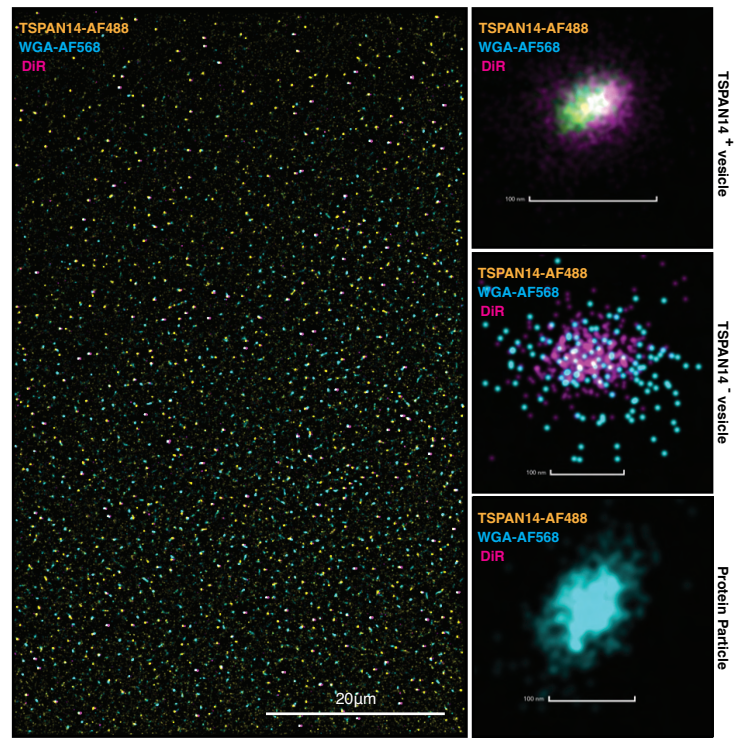**c**

## HeLa derived extracellular particles

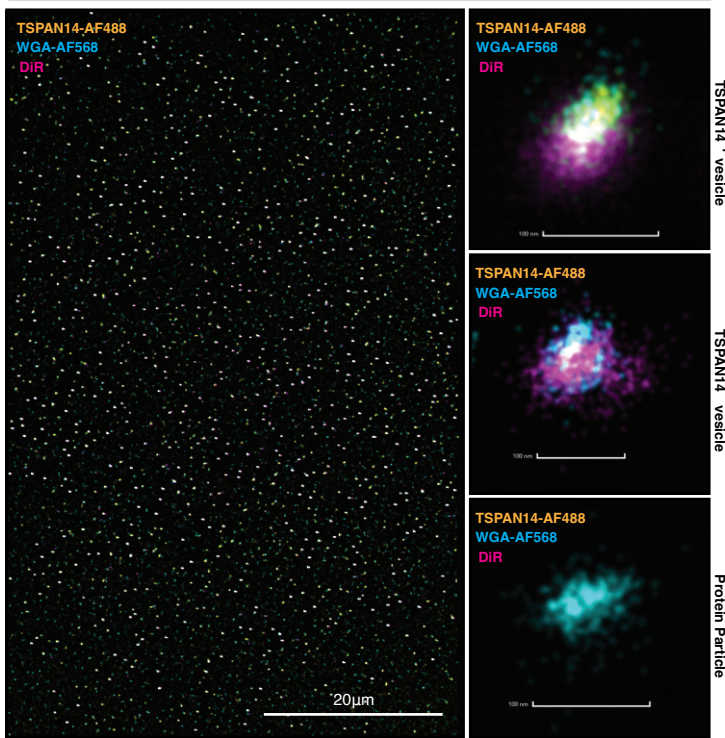**d**

## MSC(CB) derived extracellular particles

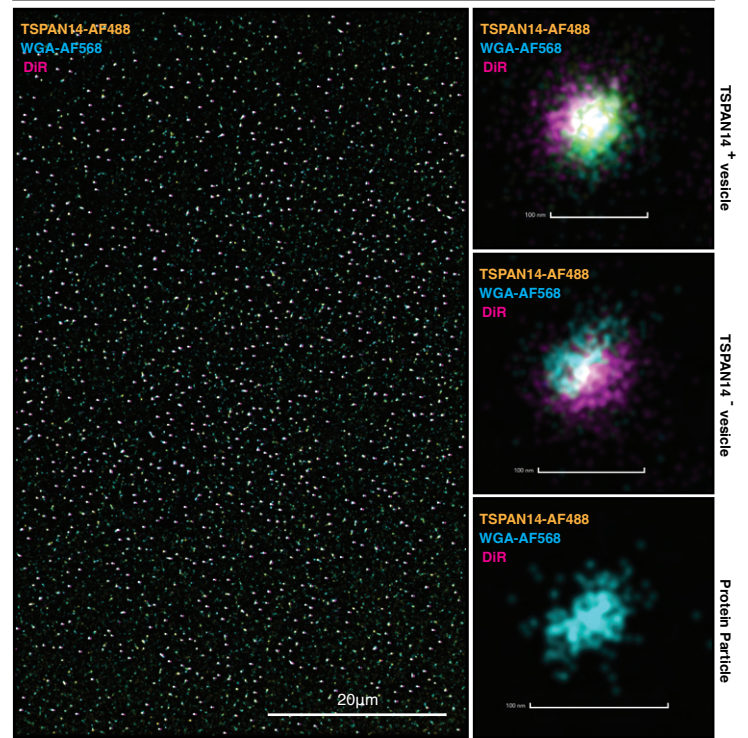**e**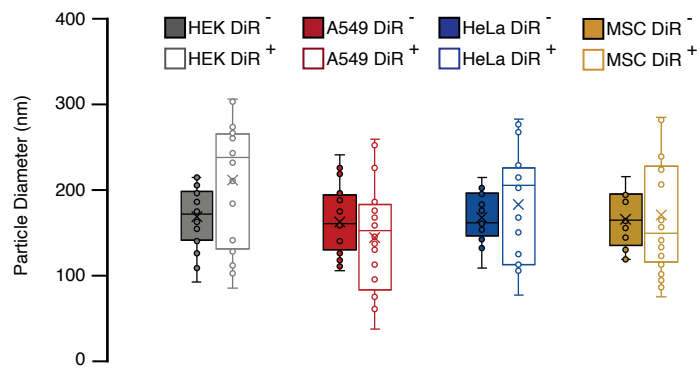

1 **Figure S2. EP subpopulation dSTORM imaging confirms presence of glycosylated NVEPs.**  
2 Single vesicle 2D SMLM dSTORM image analysis of nanoparticles from TSPAN14-mClover3  
3 expressing stable cell lines in (A) HEK-293T, (B) A549, (C) HeLa, and (D) MSC(CB).  
4 Nanoparticles isolated by SEC are stained with DiR (far red membrane intercalating dye), WGA-  
5 AF568 (wheat germ agglutinin; binds N-linked glycosylated protein residues) to detect  
6 glycosylation PTMs, and anti-GFP-AF488. Scale bar 20 $\mu$ m in full field of view and 100nm in  
7 single particle zoom panels. Representative images of TSPAN14+ EVs, TSPAN14– EVs, and  
8 WGA+ spherical protein particles are shown. (E) Box plot of particle diameter (nm) calculated  
9 using the ONI CODI software are shown for EVs (DiR+ particles) and protein particles (DiR–  
10 particles) in each cell line (pair of bars from left to right correspond to HEK, A549, HeLa and  
11 MSC). Data represents n=20 nanoparticles per group.

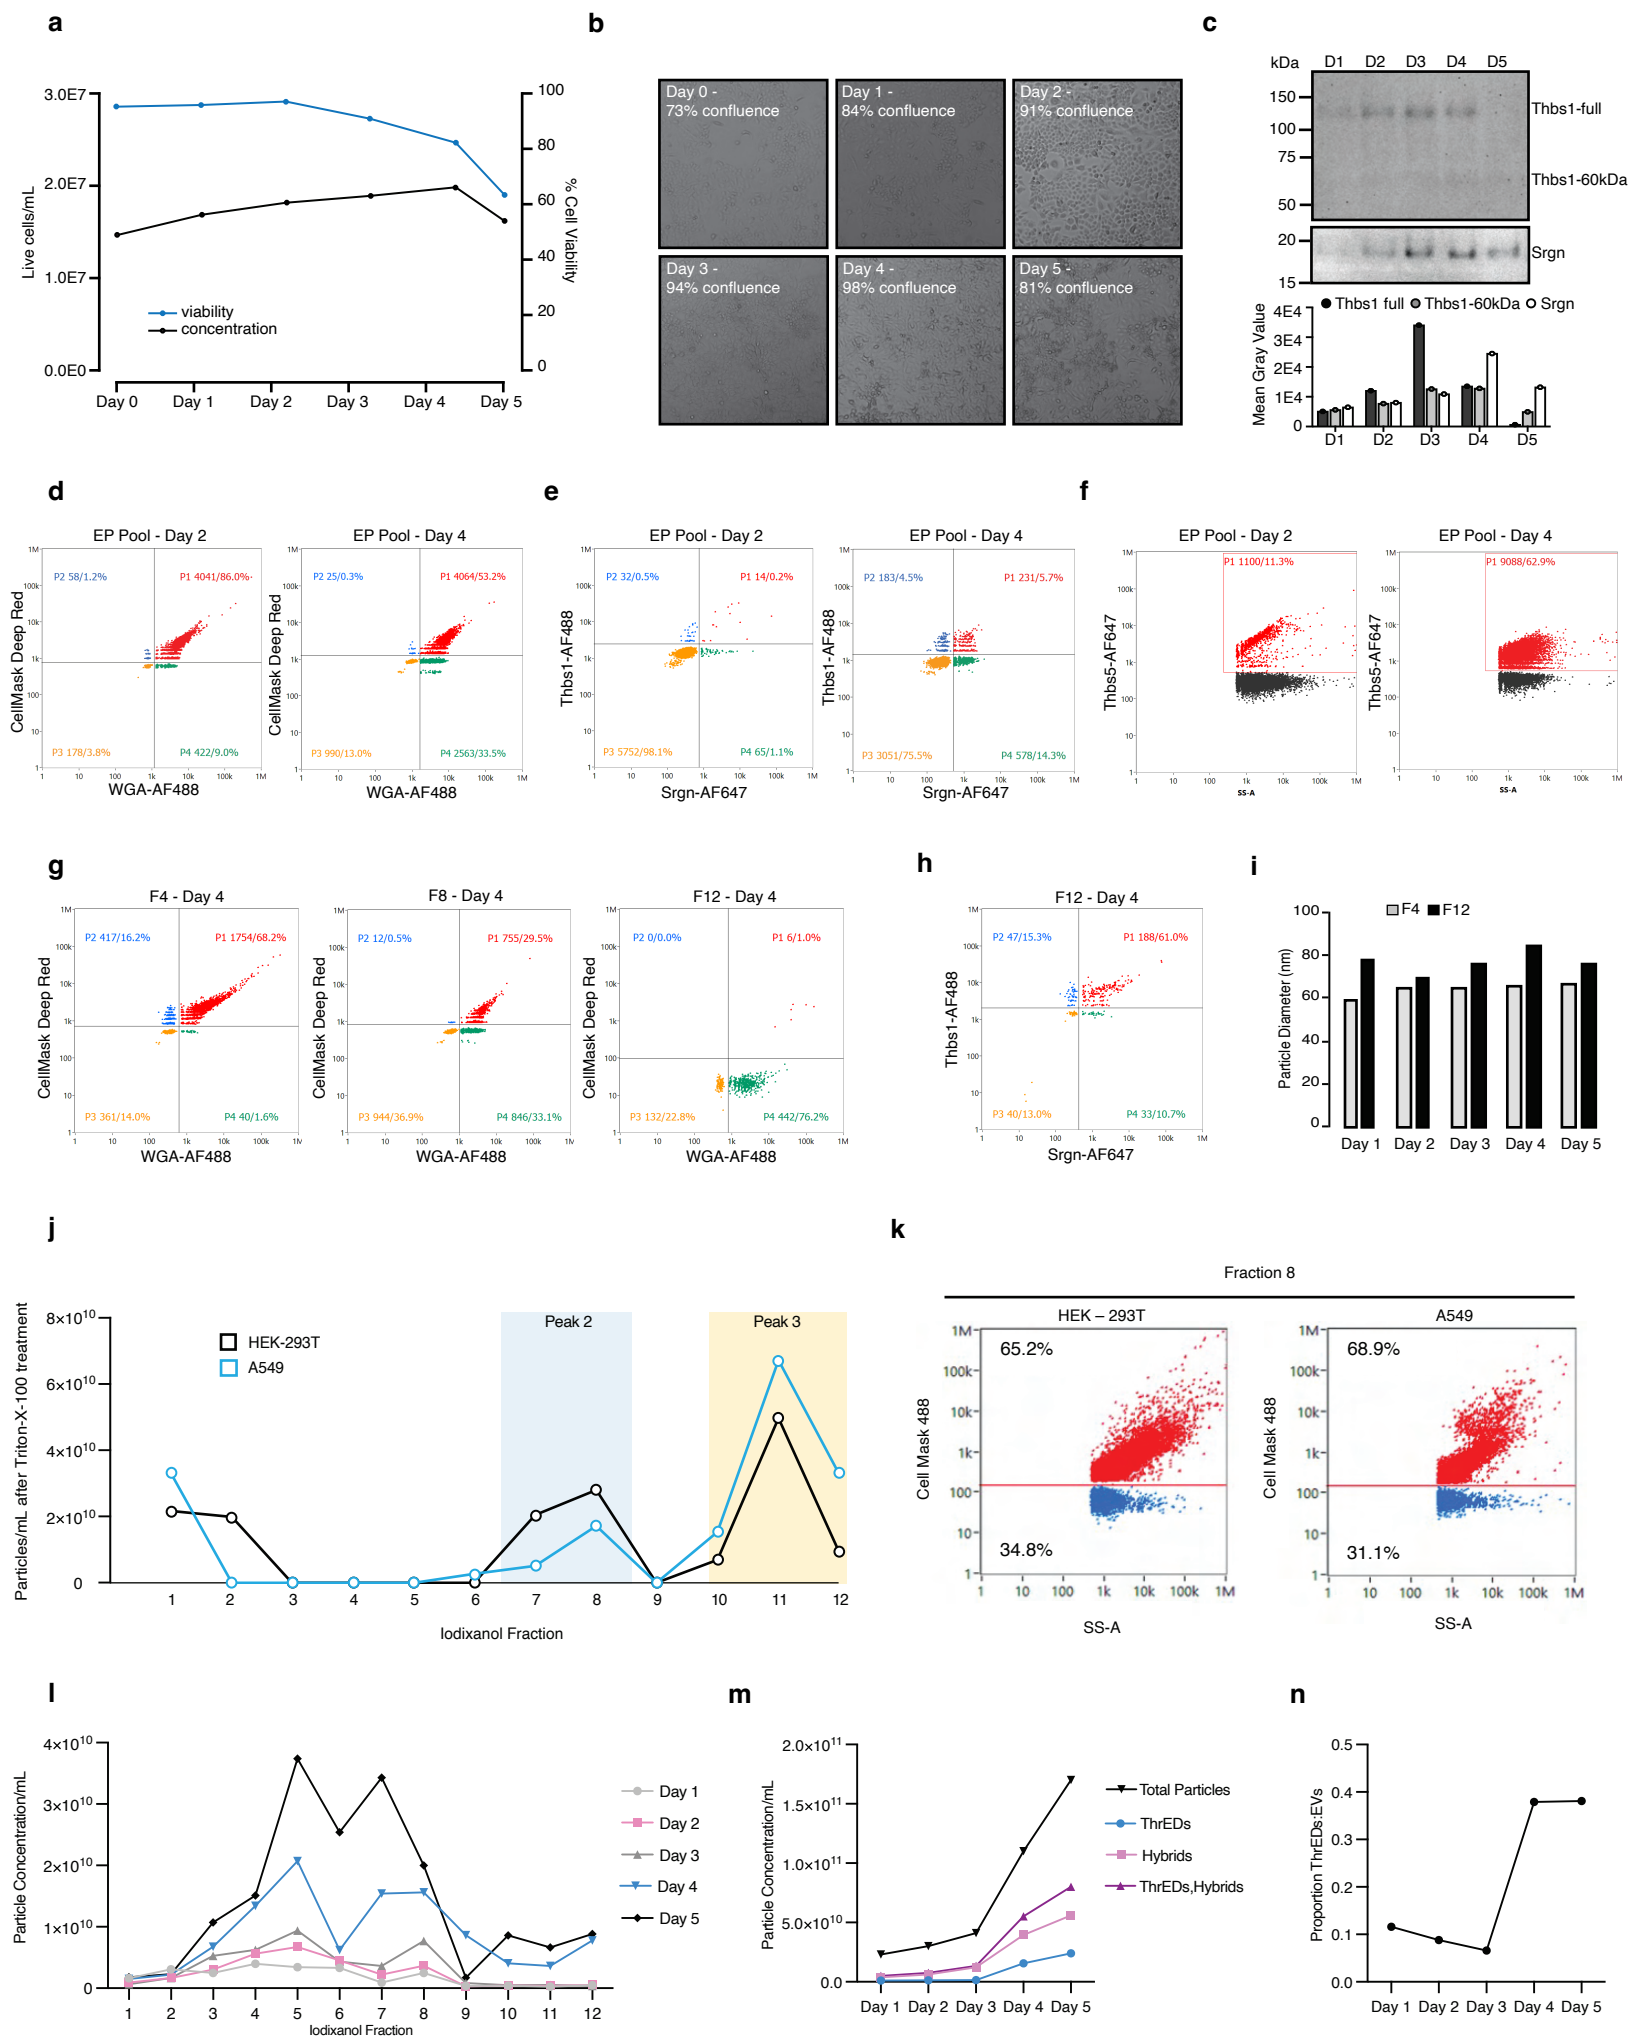



**Figure S3. Release kinetics of Thrombospondin Encapsulated Dense particles.**

(A) Plot of A549 live cell concentration in cells/mL (bottom curve) and viability (top curve) at timepoints across 5 days of collection with (B) representative micrographs of cell confluence and morphology at each day. (C) Western blot whole cell lysates from day 1 through 5 probing Thrombospondin 1 and Serglycin with associated quantification of the mean grey value of each band. (D) Nanoflow cytometry analysis of extracellular particles pools from conditioned media at days 2 and 4 probing protein (WGA) and lipid (Cell Mask) biomolecules (E) TSP1 and SRGN and (F) COMP. (G) Nanoflow cytometry analysis of f4, F8 and f12 probing protein (WGA) and lipid (Cell Mask) biomolecules and (H) f12 probing Thbs1 and Srgn, all at the day 4 time point. (I) Size profiles of EVs in f4 and ThrEDs in f12 determined by side scatter using nanoflow cytometry across time points day 1 to 5. (J) EPs were isolated in 4.5mM calcium and then treated with 1% Triton-X-100. The EP Migration profile was achieved following iodixanol density-based ultracentrifuge fractionation for Triton-X-100 treated samples. (K) Following a typical protocol without Triton-X-100, f8 fractions from HEK- 293T and A549 were stained for Cell Mask which labelled lipids (EVs), showing two populations in f8. (L) Migration profile of Extracellular Particles (EP), isolated in isosmotic buffer with 4.5mM CaCl<sub>2</sub> at time points day 1 through 5, following iodixanol density-based ultracentrifuge fractionation. (M) Concentrations of f1-12 total particles, f12+11 ThrEDs, f7+8 Hybrids, across time points and (N) the proportion of f11+12 ThrEDs relative to the proportion of f4+5 EVs across time points.

**a**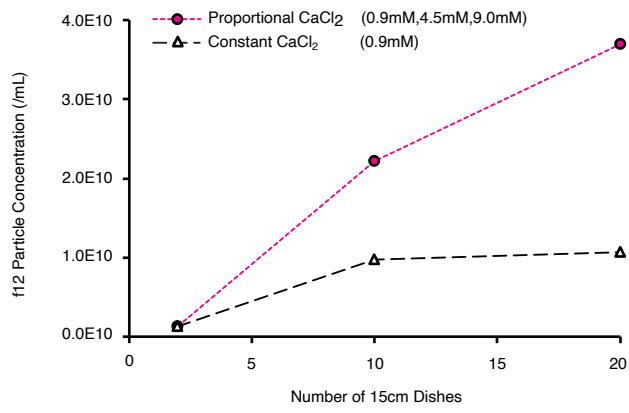**b**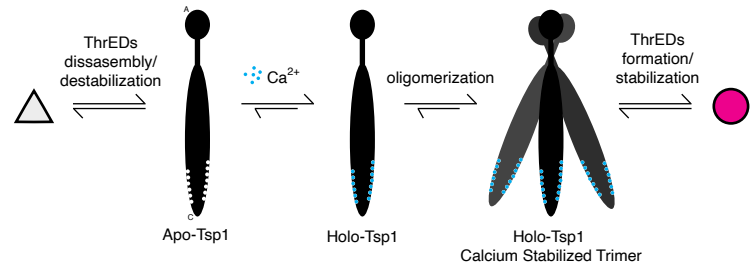**c**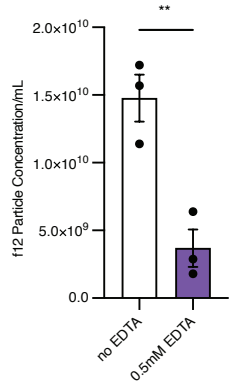**d**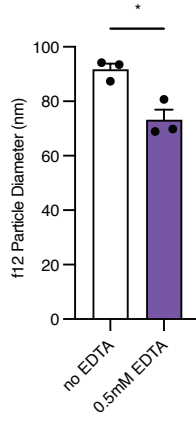**e**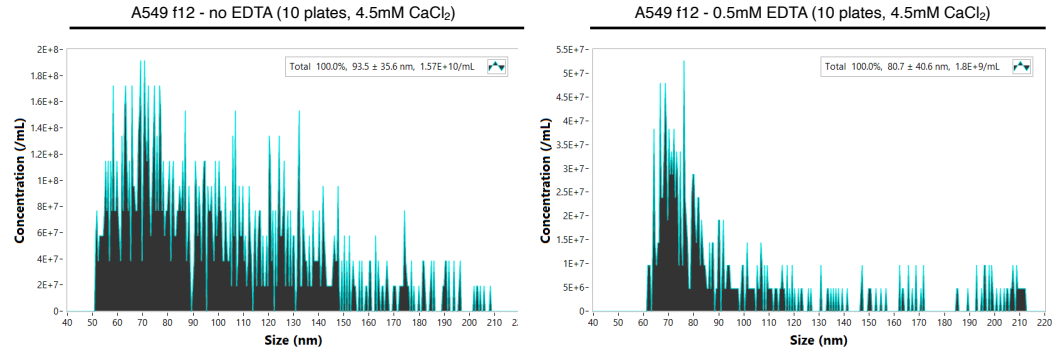**f**A549 F8 - no EDTA (10 plates, 4.5mM  $\text{CaCl}_2$ )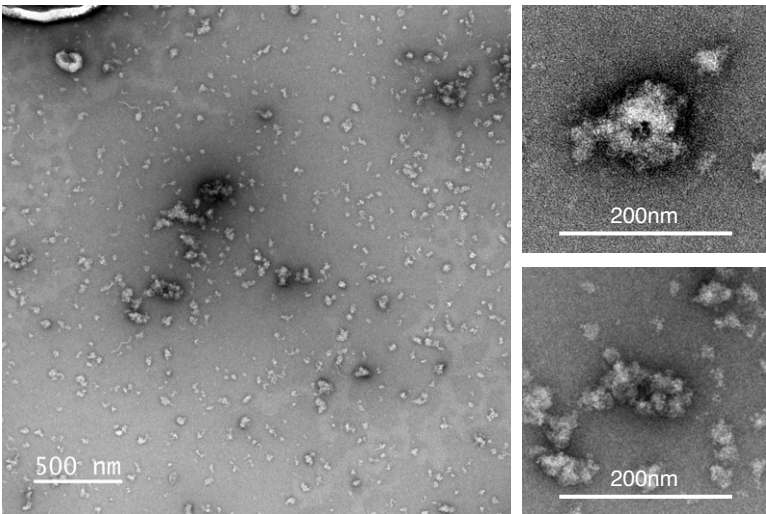**g**A549 F8 - 0.5mM EDTA (10 plates, 4.5mM  $\text{CaCl}_2$ )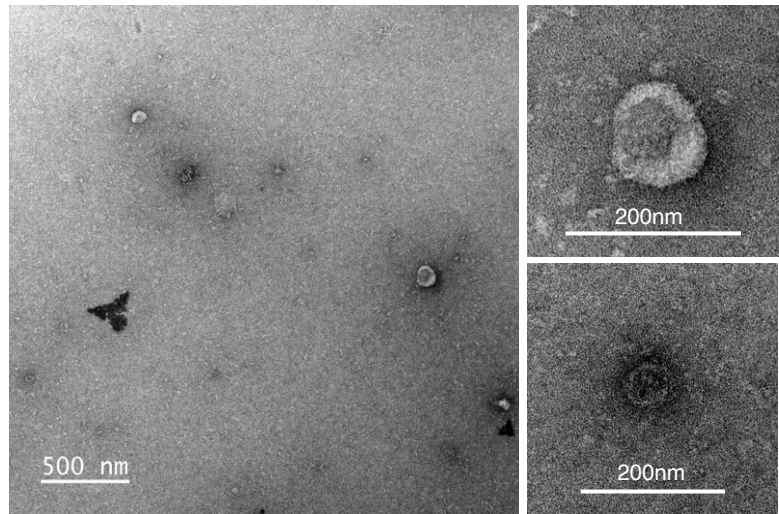

**Figure S4. Calcium is critical in the formation and stabilization of ThrEDs.**

(A) The effect of increasing amount of  $\text{CaCl}_2$  in an isosmotic buffer on ThrEDs f12 particle concentration. Samples were isolated from 2 plates, 10 plates and 20 plates, purified with constant calcium (0.9mM  $\text{CaCl}_2$ ) or proportional amounts of calcium at 0.9mM, 4.5mM and 9mM for 2, 10 and 20 plates, respectively. (B) Diagram representing the homo-trimerization of Thrombospondin 1 induced by calcium and the effect on ThrEDs stability equilibrating between low concentration and destabilized and high concentration and stable. (C) f12 particle concentration following treatment with 0.5mM EDTA and the (D) associated change in particle size with raw size distribution plots shown in (E). (C-E) were generated from 10 plates isolated in 4.5mM  $\text{CaCl}_2$ . (F-G) Demonstrate the effect of calcium stabilization on ThrEDs morphology in f8 before and after EDTA treatment. Calcium stabilization of Thrombospondin subunits is seen in (F) with dense particles abundant among EVs (hybrid population) and the loss of large ThrEDs following EDTA treatment while EVs morphology and concentration remain unchanged (G). n.s.  $P > 0.05$ , \*  $P < 0.05$ , \*\*  $P < 0.01$ . (A)  $n=1$ , (C-G)  $n=3$  biological replicates.



**a**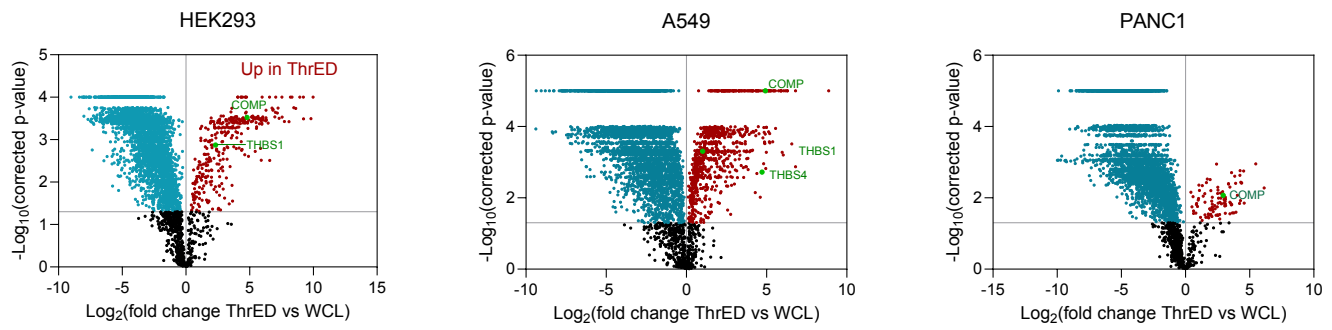**b**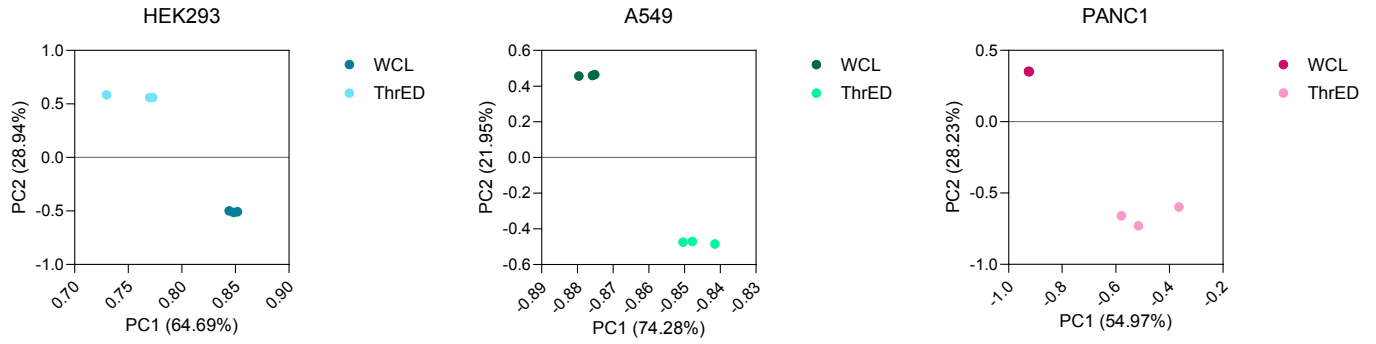**c**

Core matrix proteins

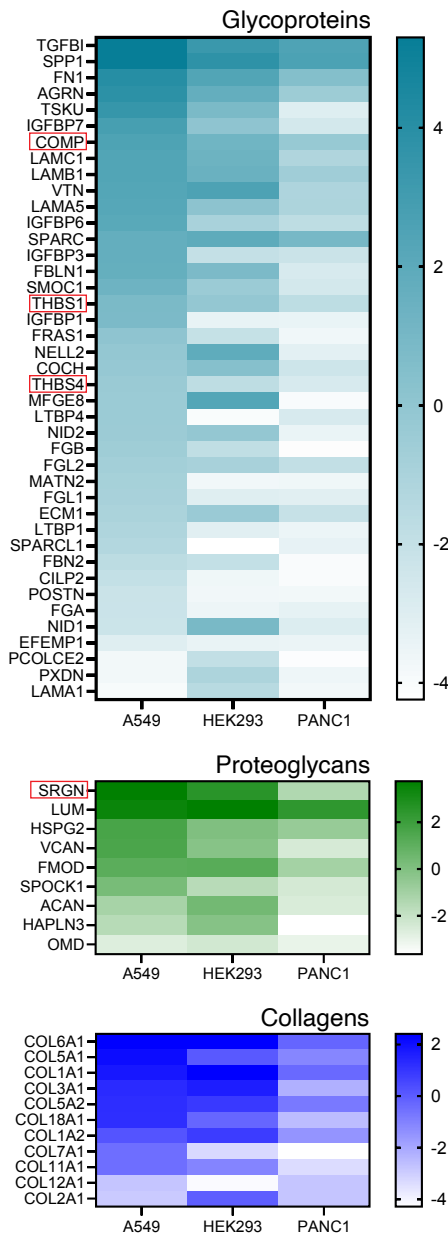**d**

Associated matrix proteins

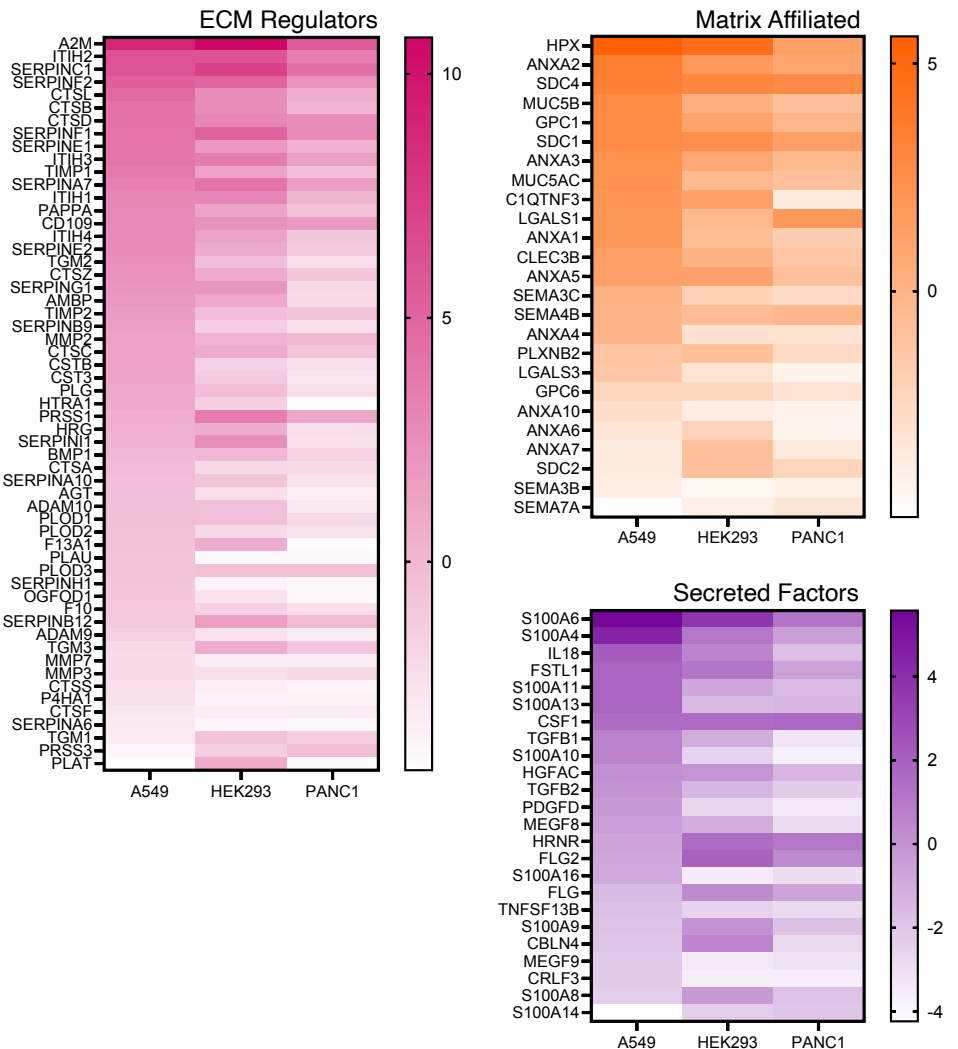

1 **Figure S5. ThrED proteomics matrix highlight core and associated matrix proteins.**  
2 (A) Volcano plots of proteins identified in ThrEDs. Red and blue labelled proteins indicate those  
3 significantly upregulated in ThrEDs or whole cell lysate, respectively. (B) PCA plots for the  
4 proteins identified in f11+12 ThrEDs and whole cell lysates of HEK293, A549, and PANC1 cells.  
5 (C-D) Heat maps of proteins quantified ( $\text{Log}_2$  abundance) in ThrEDs in A549, HEK293, PANC1  
6 sorted into protein classes and functional groupings as determined by MatrisomeDB. n=3  
7 biological replicates.

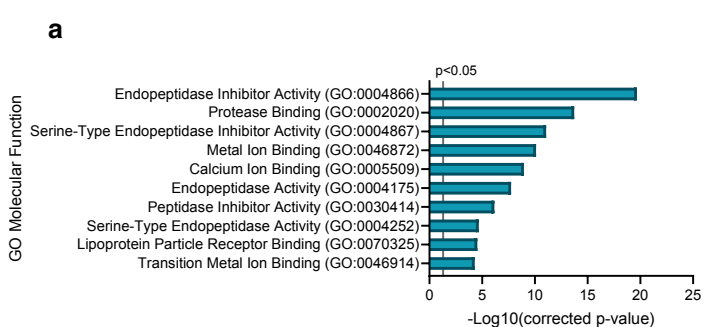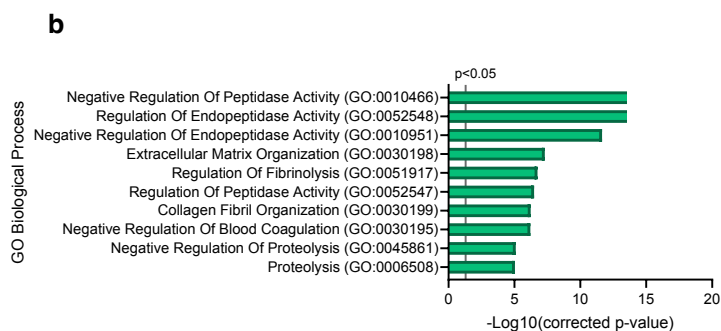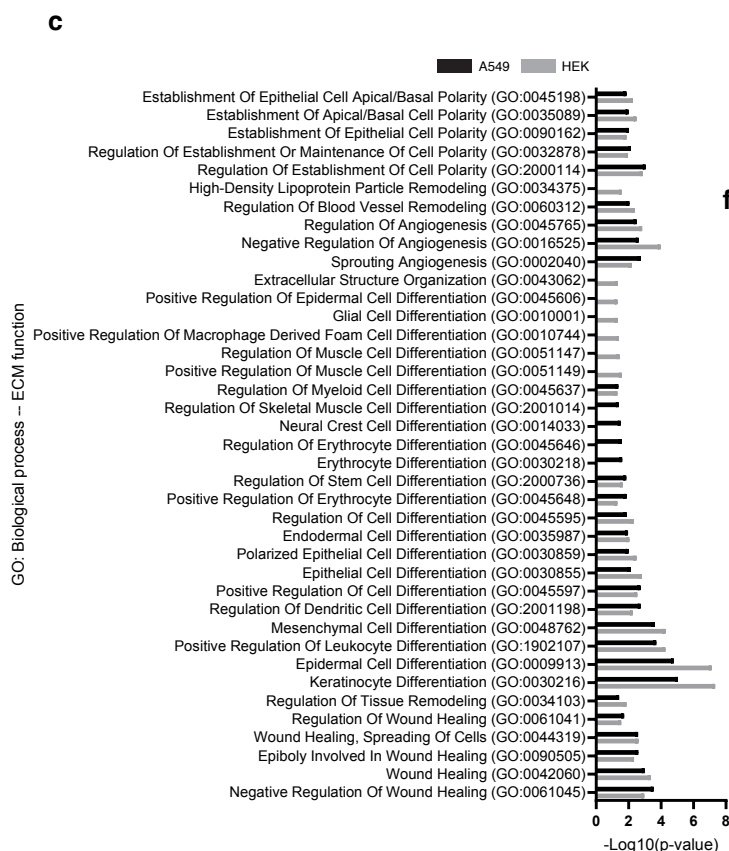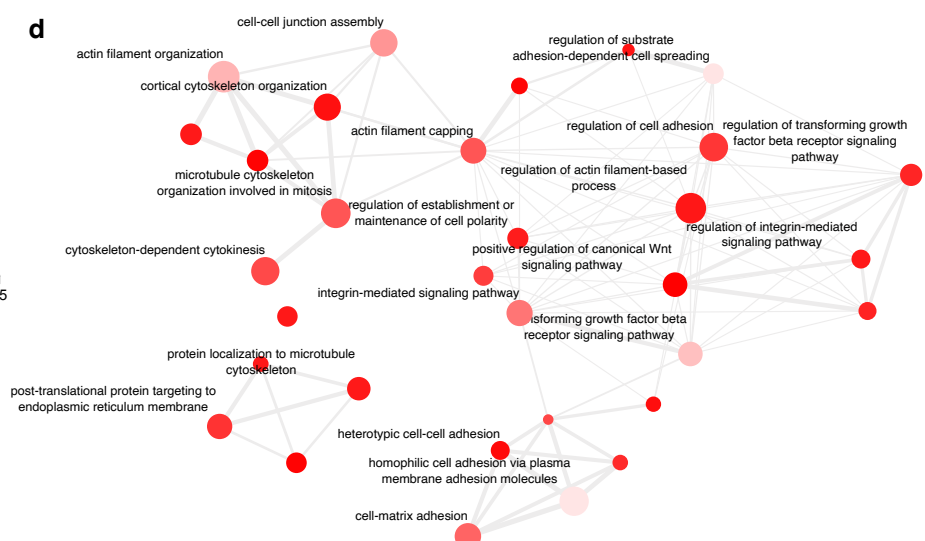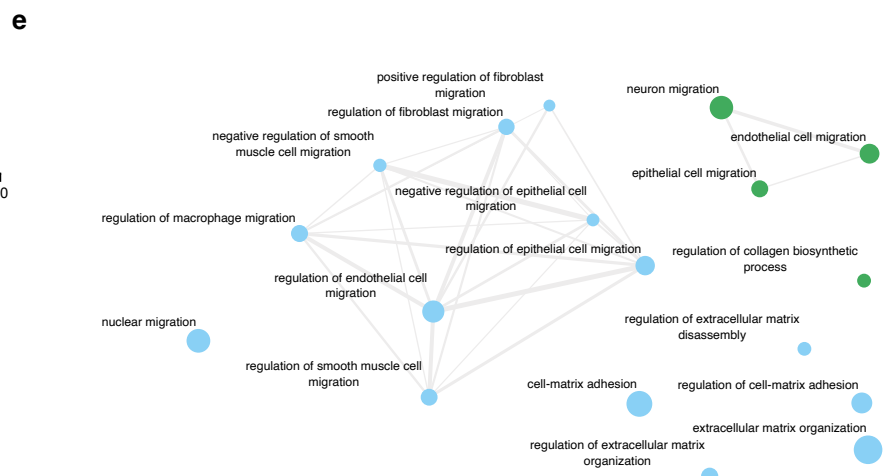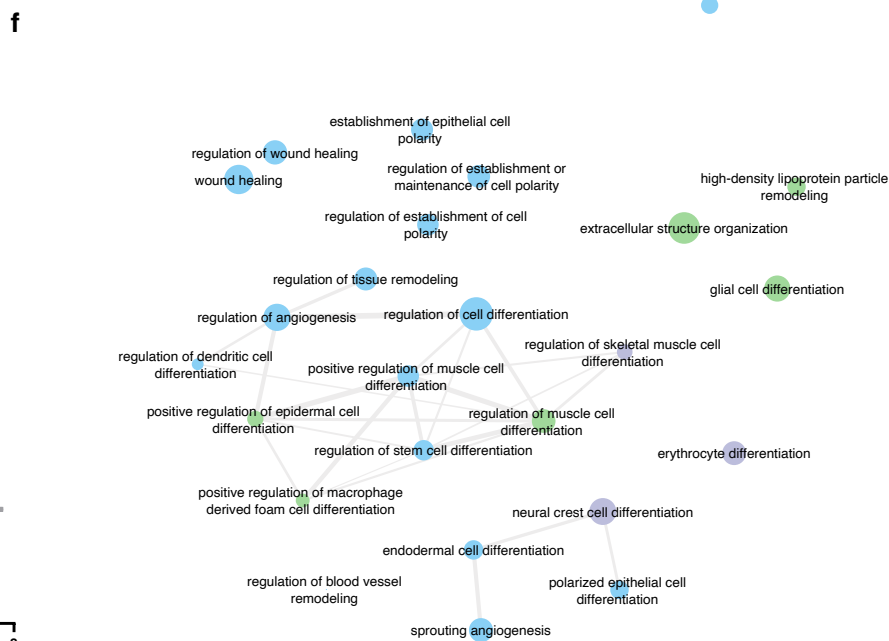

1 **Figure S6. GO term analysis of ThrED proteins have complementary and opposing**  
2 **biological and molecular ECM function.** Top ten GO terms from proteins identified in at least 2  
3 ThrEDs sources of HEK, A549, PANC1 for (A) Molecular Function, (B) Biological Process, (C)  
4 Significant GO terms related to the formation of the ECM from proteins identified in ThrED  
5 particles in HEK and A549. (D) GO term network analysis of significant, non-redundant polarity  
6 terms identified in A549 whole cell lysates. The nodes are coloured by p-value where darker red  
7 indicated increased confidence, the size of each dot represents the number of annotations of the  
8 GO term. (E) GO term network analysis on ThrED proteins from HEK and A549 involved in  
9 general ECM biology and ECM formation and (F) ECM function. Blue points are present in both  
10 HEK and A549. Green points are only in HEK and purple points are only in A549. The size of  
11 each dot describes the number of annotations for that GO term. n=3 biological replicates.

**a**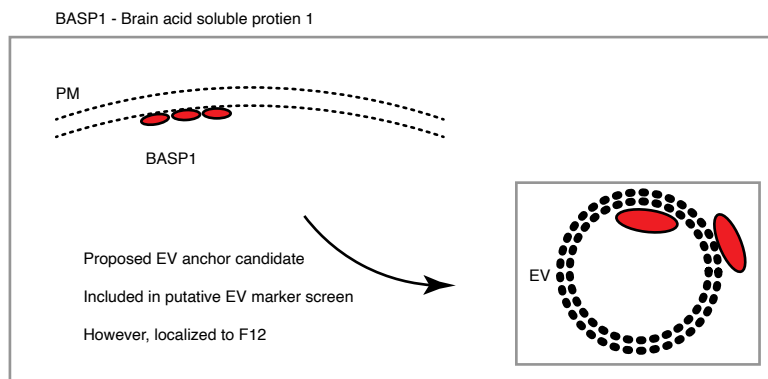**b**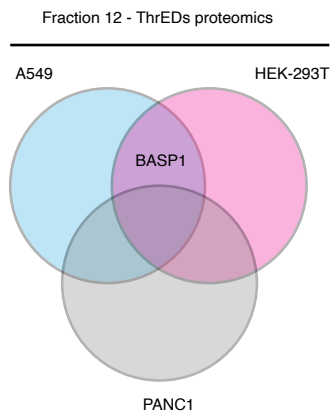**c**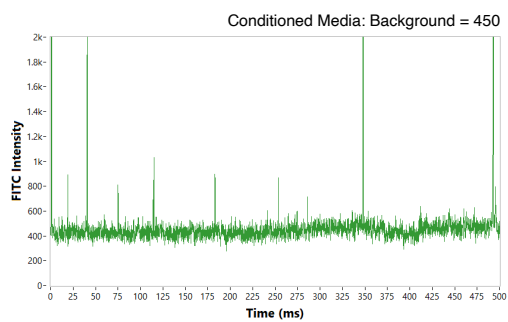**d**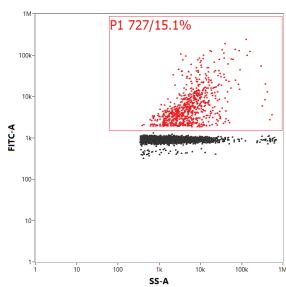**e**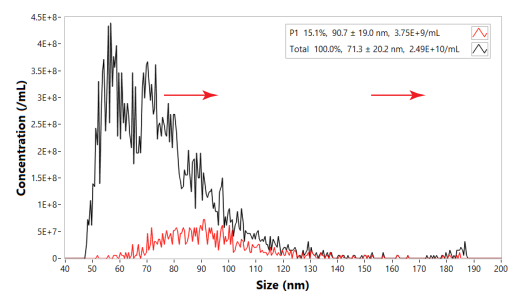**f**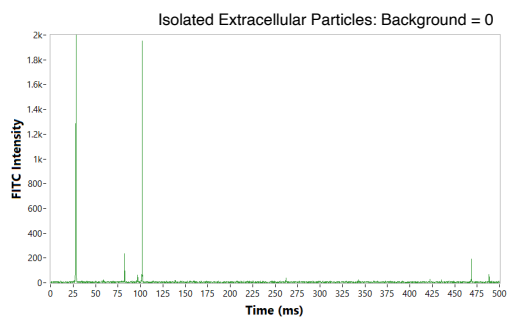**g**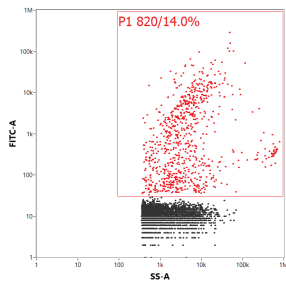**h**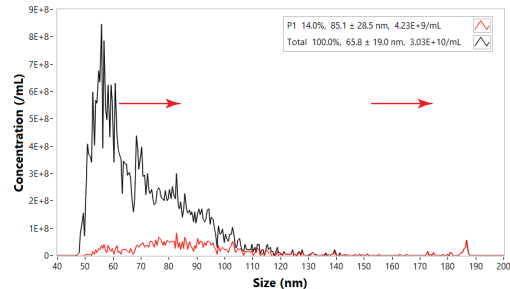



**Figure S7. BASP1 is a Thrombospondin Encapsulated Dense Particle protein.**

(A) Diagram of Brain Acid Soluble Protein 1 (BASP1) a membrane associated cytosolic protein which has typically been described as an extracellular vesicle protein marker (was therefore included in the screen in Figure 1). (B) BASP1 is one of the abundant, common proteins present in ThrED f11-12 samples. (C) Shows the raw FITC readings from the nanoflow cytometer when measuring BASP1-mClover and associated dot plot. The horizontal dotted line represents where a gate would typically be placed resulting in the incorrect gating on BASP1-mClover3 presence in EP samples and a nearly 100% positive FITC population, as has been previously published. (D) Demonstrates where the gate should be placed based on the high background in the sample. (E) Shows the size profile of BASP1 positive and negative extracellular particles with a greater average diameter in positive particles. (F-H) Show the same data from samples isolated using Size Exclusion Chromatography instead of crude conditioned media. (F) Shows lower background when soluble BASP1 proteins are separated from EPs during purification and (G) shows the correct gating. (H) Identifies a similar size profile as in (E). n=3 biological replicates.

a

A549 Whole Cell Lysate - Proteostatic Stress Pathway Enrichment

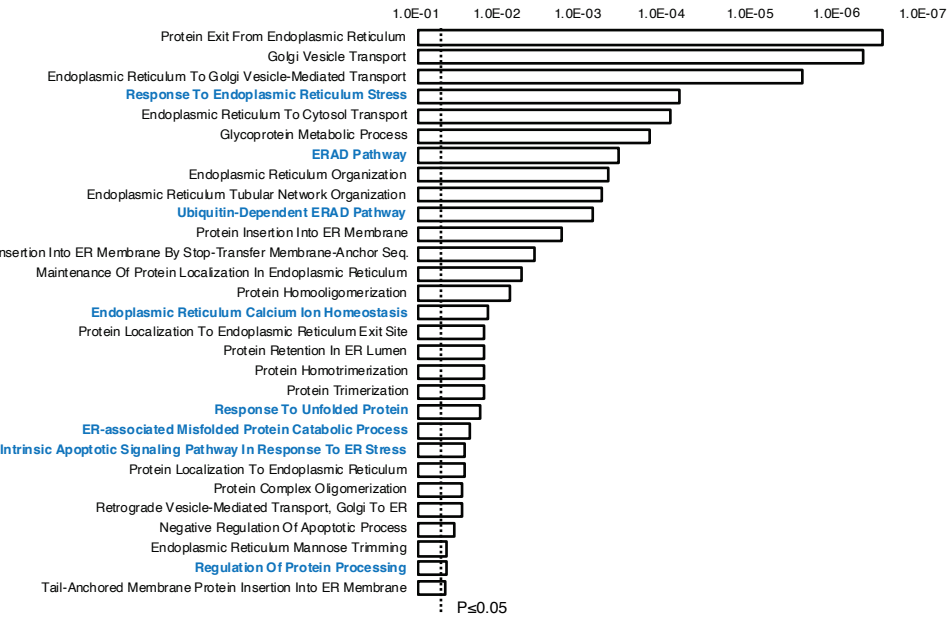

b

A549 f11-12 ThrEDs - Proteostatic Stress Protein Enrichment

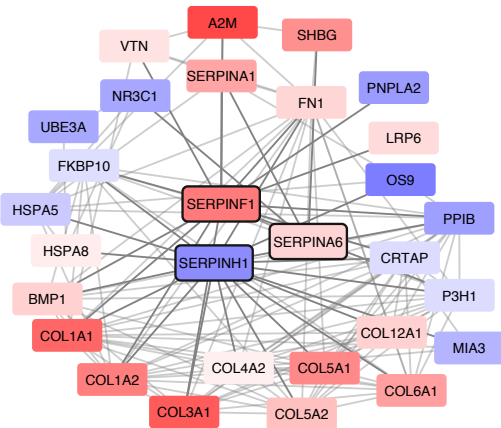

1 **Figure S8. GO term enrichment analysis of proteostatic stress pathways in A549 lysates and**  
2 **ThrEDs**  
3 (A) Significant GO terms from proteomics analysis carried out on A549 whole cell lysates at day  
4 4 involved in protein stress response and unfolded protein response and (B) Proteins significantly  
5 upregulated in ThrEDs involved in the UPR, cellular stress and ER stress pathways potentially  
6 involved in ThrEDs biogenesis and cargo loading. n=3 biological replicates.

**a**

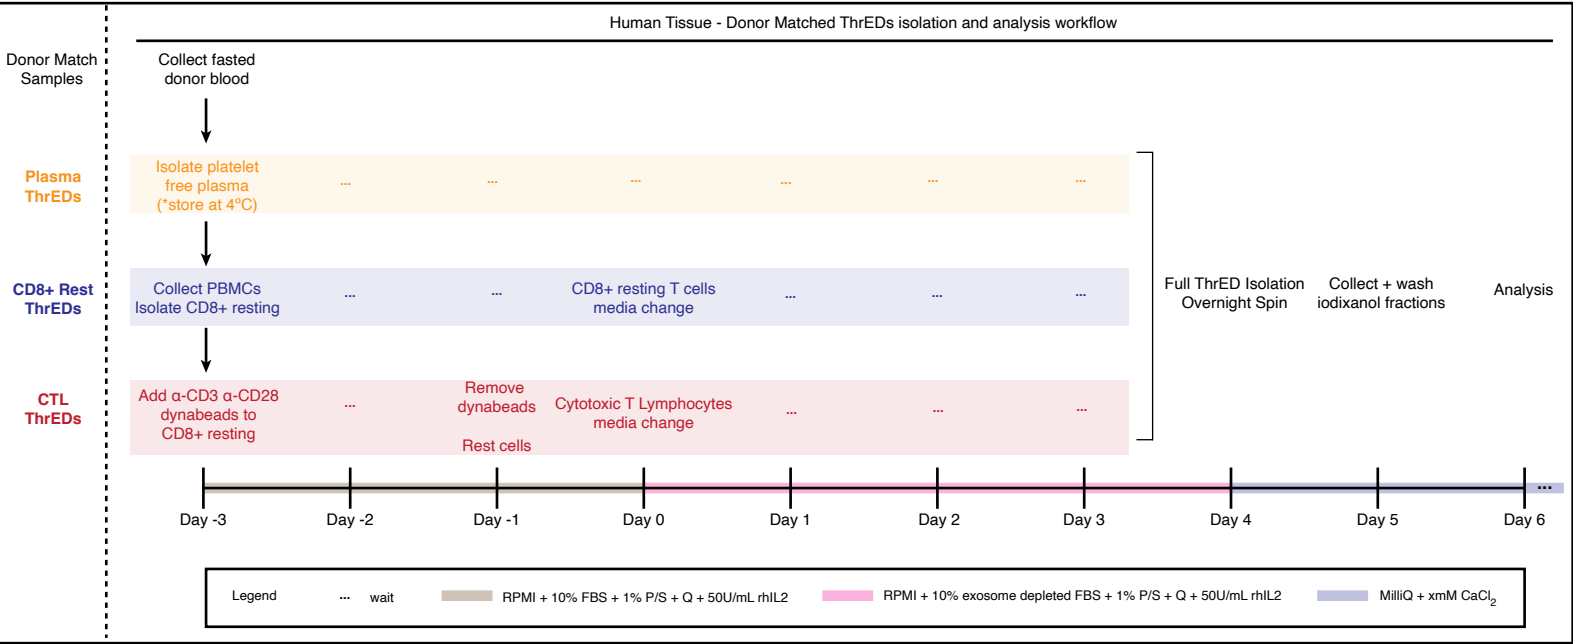

**b**

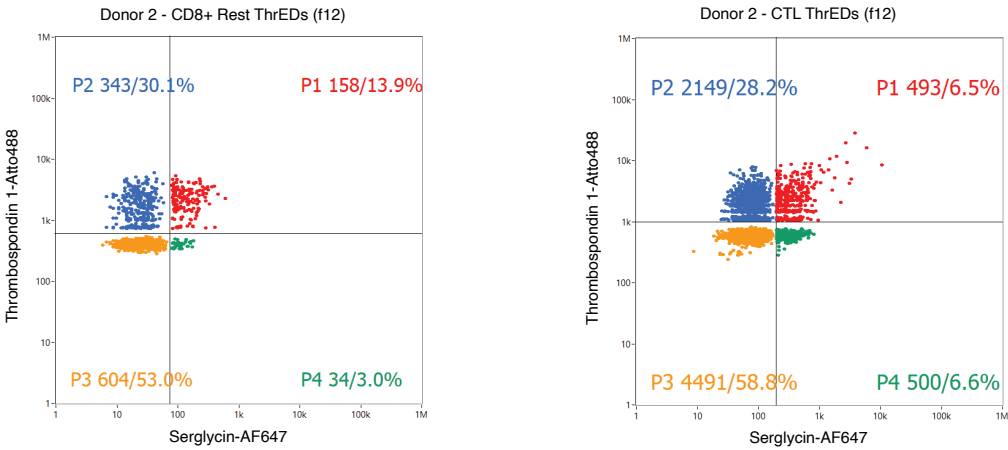

**c**

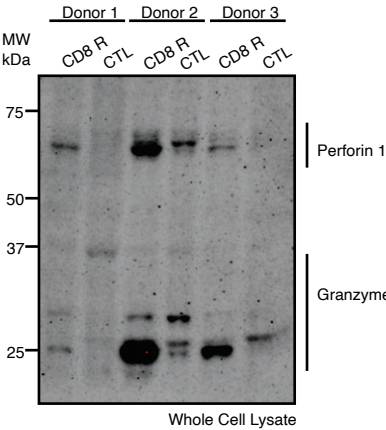

**d**

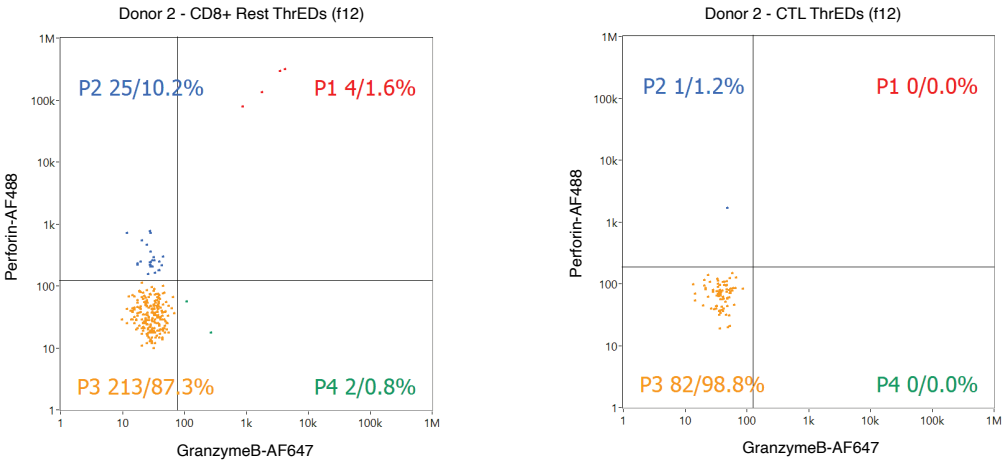

1 **Figure S9. ThrED isolation and characterization from donor matched human tissue.**  
2 (A) Schematic diagram of protocol timing for ThrEDs in Donor Matched tissues. Fasted blood is  
3 collected from donors to generate Platelet Free Plasma, resting CD8<sup>+</sup> cells and Cytotoxic T  
4 lymphocyte (CTLs). Media used at each step and timing for ThrEDs collection is highlighted. (B)  
5 Nanoflow cytometry analysis of f12 ThrEDs from CD8<sup>+</sup> Resting population and CTLs probing  
6 Thrombospondin-1 and Serglycin. (C) Western blot of whole cell lysate from donor resting CD8<sup>+</sup>  
7 T cells and cytotoxic T lymphocytes probed with Perforin 1 and Granzyme B antibodies to confirm  
8 positive cellular expression. (D) Nanoflow cytometry analysis of Donor 2 f12 ThrEDs samples  
9 from resting CD8<sup>+</sup> cells and CTLs probing Granzyme B and Perforin 1. Data represents n=6  
10 donors. Representative images are shown.



**a**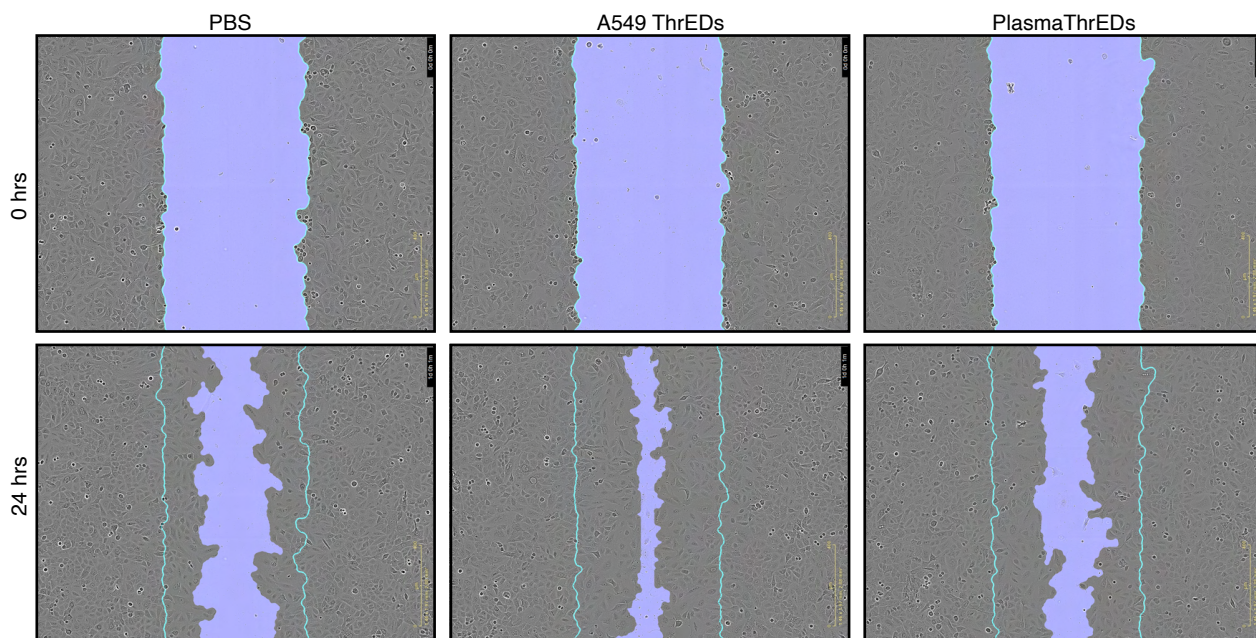**b**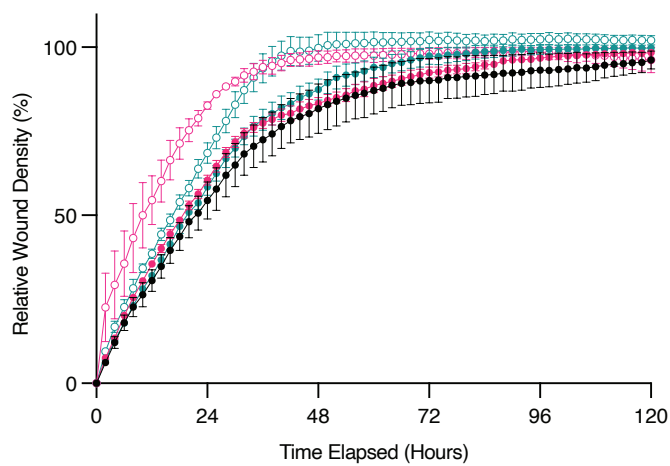**c**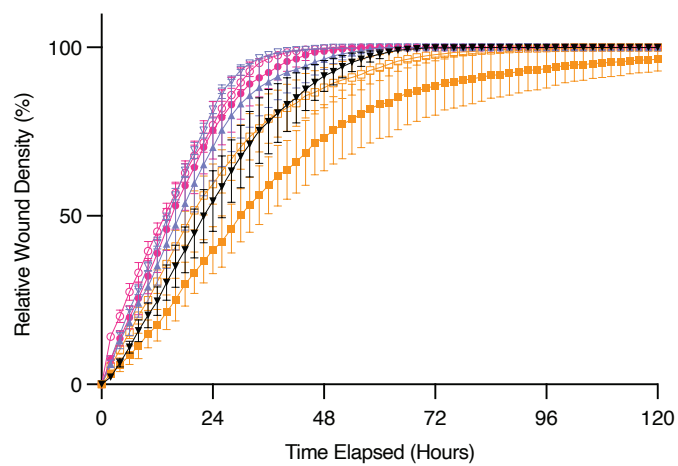**d**

Wound - A549

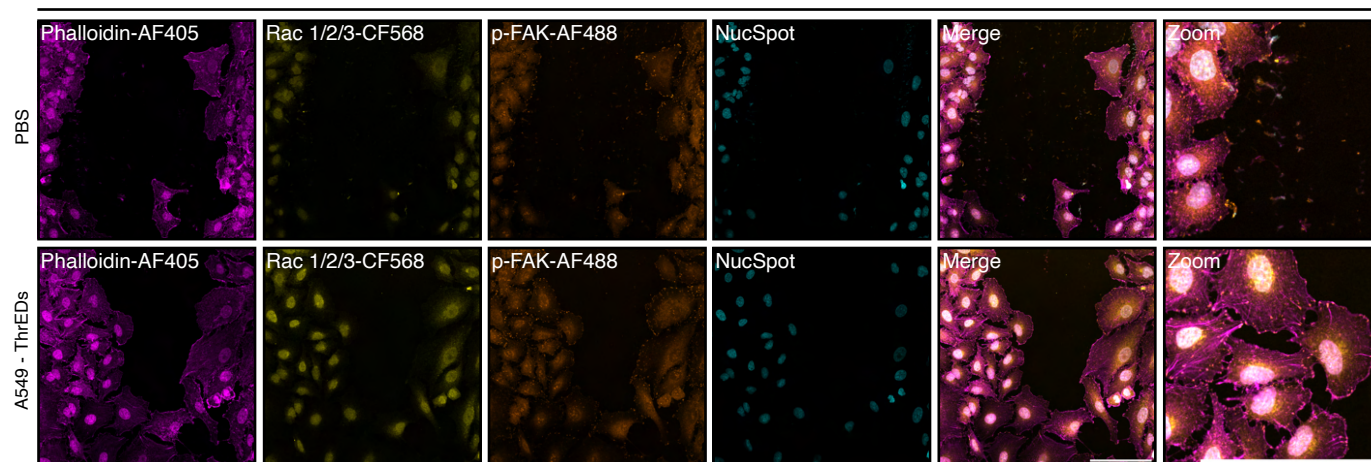**e**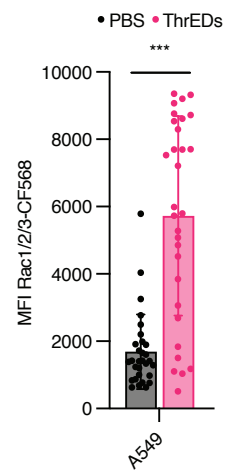

1 **Figure S10. ThrED positive effectors of wound healing in lung adenocarcinoma cells.**  
2 (A) Representative images of scratch wounds in A549 cells treated with PBS, A549 ThrEDs and  
3 Plasma ThrEDs. Initial scratch is shown with a border line (cyan), and the wound area is shown in  
4 light purple (the central region). At the 24-hour time point the scratch wound mask fails to  
5 recognize certain migrating cells in ThrED treated samples because the cell morphology changes  
6 drastically following particle administration to promote migration. (B) Relative wound density of  
7 A549 wounds treated with A549 and Plasma ThrEDs from (A) at 2 different doses showing a dose  
8 response. (C) Relative wound density of A549 wounds treated with PBS, EVs, Hybrids and  
9 ThrEDs at different doses. (D) Confocal imaging of Rac1/2/3 and p-FAK in A549 wounds treated  
10 with PBS and ThrEDs at 24 hrs with associated MFI quantification of images (E). Scale  
11 bar=100µm. Data represents n=3 biological replicates.
